# Supplementary material for: pH-responsive assembly and disassembly of a supramolecular cryptand-based pseudorotaxane driven by π–π stacking interaction
Source: Royal Society of Chemistry journal article supplement (doi:10.1039/c1cc13472h), 2011-01-01
Supplement: c1cc13472h.pdf [file c1cc13472h.pdf]

## **pH-Responsive assembly and disassembly of a supramolecular cryptand-based pseudorotaxane driven by $\pi$ - $\pi$ stacking interaction**

Xuzhou Yan, Mingming Zhang, Peifa Wei, Bo Zheng, Xiaodong Chi, Xiaofan Ji, and Feihe Huang\*

*Department of Chemistry, Zhejiang University, Hangzhou, Zhejiang 310027, P. R. China,*

Fax and Tel: +86-571-8795-3189; Email address: fhuang@zju.edu.cn.

### **Electronic Supplementary Information (19 pages)**

|                                                                                                                                       |     |
|---------------------------------------------------------------------------------------------------------------------------------------|-----|
| 1. <i>Materials and methods</i>                                                                                                       | S2  |
| 2. <i>Synthesis of compounds <b>2</b> and <b>3</b></i>                                                                                | S3  |
| 3. <i>Job plots of <b>1</b>↔<b>3</b>, <b>2</b>↔<b>3</b>, and <b>2</b>↔<b>4</b> based on UV-Vis data in acetone</i>                    | S9  |
| 4. <i>Determination of association constants of <b>1</b>↔<b>3</b>, <b>2</b>↔<b>3</b>, and <b>2</b>↔<b>4</b></i>                       | S11 |
| 5. <i>Electrospray ionization mass spectra of equimolar acetone solutions of <b>2</b> with either of guests <b>3</b> and <b>4</b></i> | S15 |
| 6. <i>Partial <sup>1</sup>H NMR spectra of equimolar solutions of either of hosts <b>1</b> and <b>2</b> with guests <b>3</b></i>      | S17 |
| 7. <i>Schematic representation of reversible control of the formation of [2] pseudorotaxane based on a supramolecular cryptand</i>    | S18 |
| 8. <i>X-ray crystal data for <b>2</b>↔<b>3</b></i>                                                                                    | S18 |
| 9. <i>X-ray crystal data for <b>2</b>↔<b>4</b></i>                                                                                    | S18 |

### *1. Materials and methods*

All reagents were commercially available and used as supplied without further purification. BMP32C10 (**1**), BMP32C10 diol (**5**) was synthesized by published literature procedures.<sup>S1</sup> <sup>1</sup>H NMR spectra were collected on a temperature-controlled 400 MHz or 500 MHz spectrometer. <sup>13</sup>C NMR spectra were recorded on a Bruker AVANCE DMX-500 spectrometer at 125 MHz. Low-resolution electrospray ionization (LRESI) mass spectra were obtained on a Bruker Esquire 3000 plus mass spectrometer (Bruker-Franzen Analytik GmbH Bremen, Germany) equipped with ESI interface and ion trap analyzer. High-resolution electrospray ionization (HRESI) mass spectra were obtained on a Bruker 7-Tesla FT-ICR mass spectrometer equipped with an electrospray source (Billerica, MA, USA). The melting points were collected on a SHPSIC WRS-2 automatic melting point apparatus. The crystals data were collected on an Oxford Diffraction Xcalibur Atlas Gemini ultra.

## 2. Synthesis of **2** and **3**

**Scheme S1.** Synthesis of **2** and **3**.

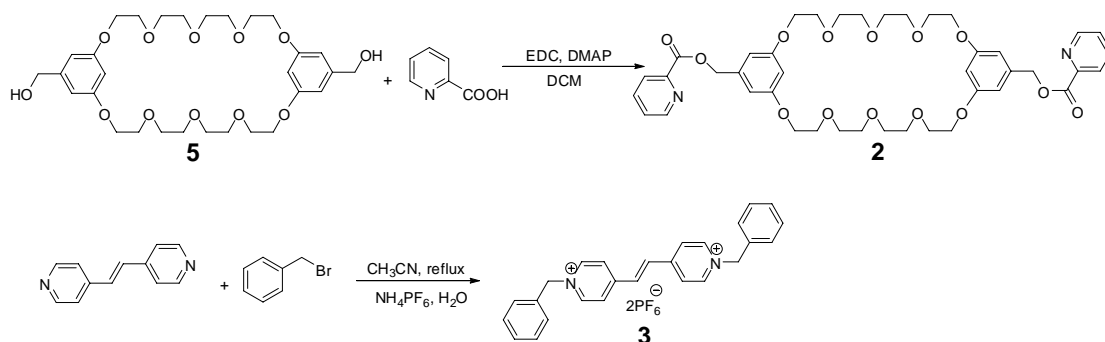

### 2.1. Synthesis of compound **2**

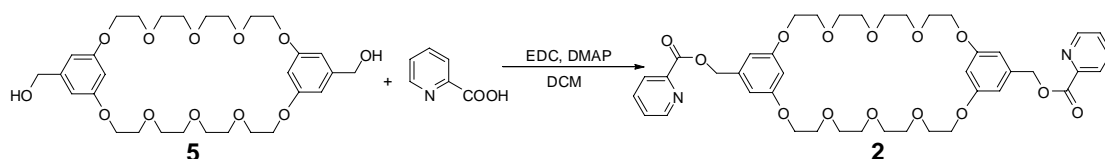

A solution of **5** (597 mg, 1.0 mmol),  $\alpha$ -picolinic acid (739 mg, 6.0 mmol) and 4-dimethylaminopyridine (DMAP) (122 mg, 1.0 mmol) in dichloromethane (30 mL) was stirred for 10 minutes at 0 °C. To this solution was added EDC (383 mg, 2.0 mmol). The reaction mixture was stirred for 24 h at room temperature, filtered, and concentrated to give a crude, which was purified by flash column chromatography (methanol/dichloromethane, 100:1 *v/v*) to afford **2** as a white solid (710 mg, 88%). The  $^1\text{H}$  NMR spectrum of **2** is shown in Figure S1.  $^1\text{H}$  NMR (400 MHz, chloroform-*d*, room temperature)  $\delta$  (ppm): 8.75 (d,  $J = 4.0$  Hz, 2H), 8.10 (d,  $J = 8.0$  Hz, 2H), 7.79–7.83 (m, 2H), 7.44–7.47 (m, 2H), 6.60 (d,  $J = 1.6$  Hz, 4H), 6.43 (s, 2H), 5.33 (s, 4H), 4.03–4.06 (m, 8H), 3.79–3.81 (m, 8H), 3.59–3.73 (m, 16H). mp 79.6–81.3 °C. The  $^{13}\text{C}$  NMR spectrum of **2** is shown in Figure S2.  $^{13}\text{C}$  NMR (125 MHz, chloroform-*d*, room temperature)  $\delta$  (ppm): 67.54, 67.78, 69.81, 71.03, 71.06, 101.54, 107.37, 125.54, 127.19, 137.23, 137.92, 148.10, 150.12, 160.26, and 165.11. LRESIMS is shown in Figure S3:  $m/z$  807.3 [ $\text{M} + \text{H}$ ] $^+$  (100%), 829.3 [ $\text{M} + \text{Na}$ ] $^+$  (100%), 845.2 [ $\text{M} + \text{K}$ ] $^+$  (100%). HRESIMS:  $m/z$  calcd for [ $\text{M}$ ] $^+$   $\text{C}_{42}\text{H}_{50}\text{N}_2\text{O}_{14}$ , 806.3262; found 806.3246, error  $-2.0$  ppm.

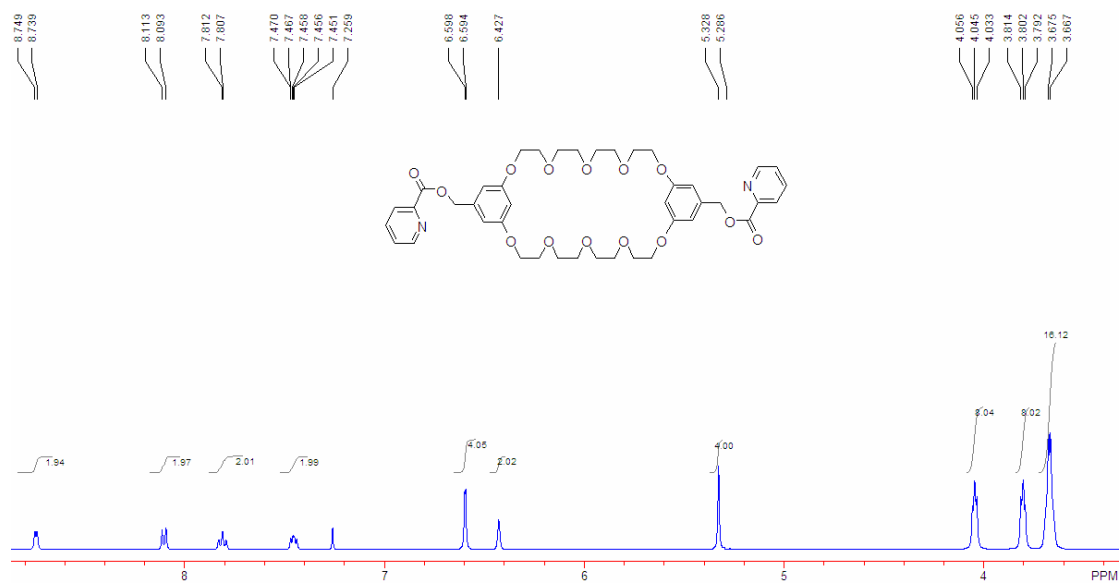

**Figure S1.** <sup>1</sup>H NMR spectrum (400 MHz, chloroform-*d*, room temperature) of 2.

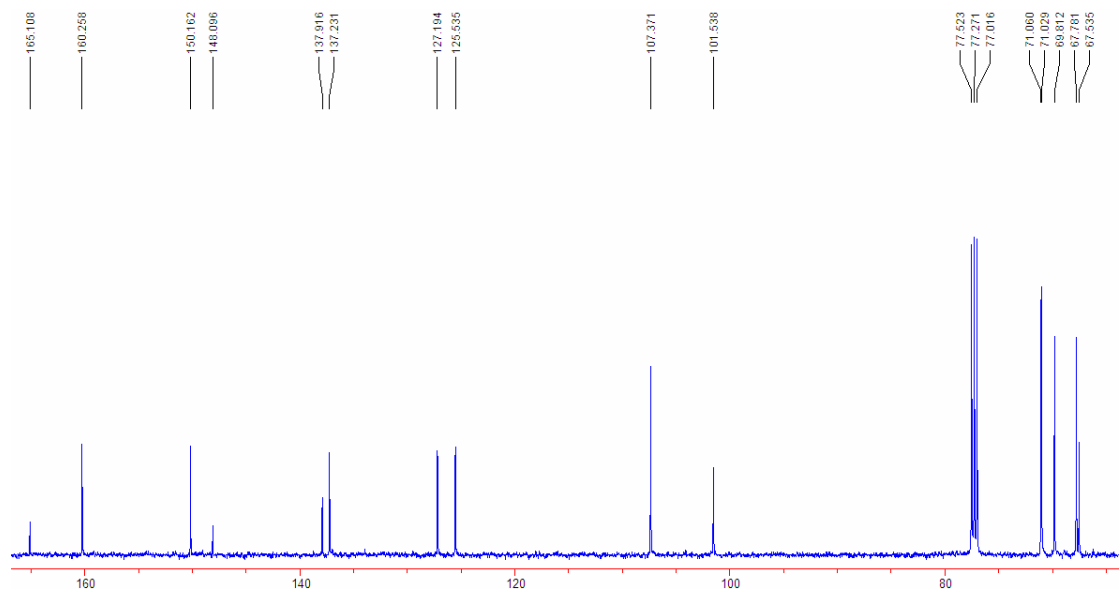

**Figure S2.** <sup>13</sup>C NMR spectrum (125 MHz, chloroform-*d*, room temperature) of 2.

## Display Report

### Analysis Info

Analysis Name 11041228.d  
Method Copy of E3Kp Default.ms  
Sample Name YXZ-229  
Comment

Acquisition Date 04/12/11 10:16:52  
Operator Administrator  
Instrument esquire3000plus

### Acquisition Parameter

|                   |            |              |           |                          |          |
|-------------------|------------|--------------|-----------|--------------------------|----------|
| Ion Source Type   | ESI        | Ion Polarity | Positive  | Alternating Ion Polarity | off      |
| Mass Range Mode   | Std/Normal | Scan Begin   | 104 m/z   | Scan End                 | 1800 m/z |
| Capillary Exit    | 203.5 Volt | Skim 1       | 40.0 Volt | Trap Drive               | 55.5     |
| Accumulation Time | 685 µs     | Averages     | 5 Spectra | Auto MS/MS               | off      |

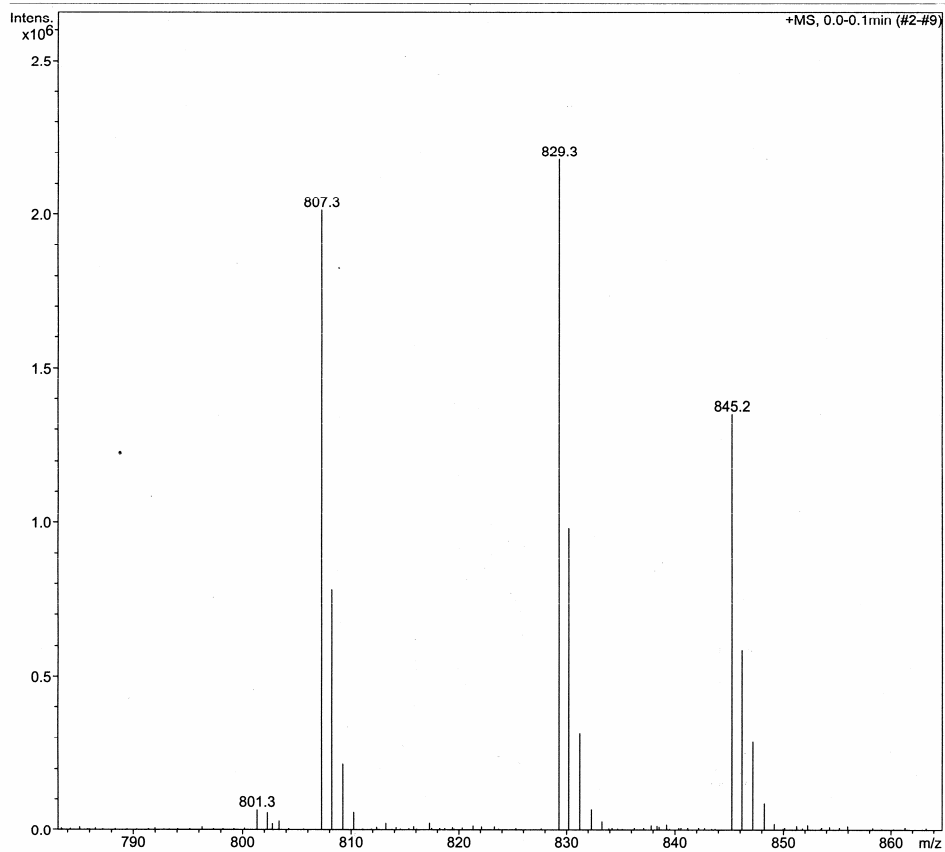

Bruker Daltonics DataAnalysis 3.1

printed: 04/18/11 09:40:32

Page 1 of 1

**Figure S3.** Electrospray ionization mass spectrum of **2**.

## 2.2. Synthesis of compound **3**

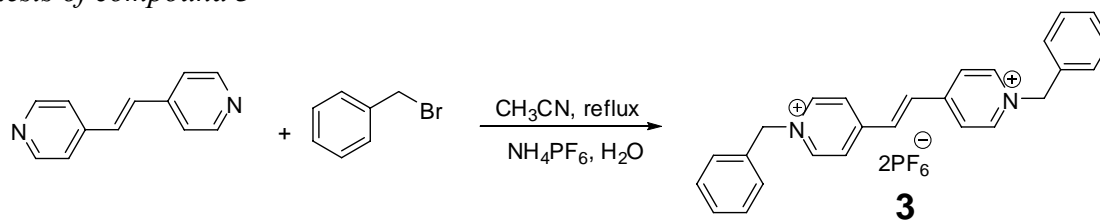

A mixture of benzyl bromide (1.03 g, 6.0 mmol) and 1,2-bis(4-pyridyl)ethylene (182 mg, 1.0 mmol) was dissolved in  $\text{CH}_3\text{CN}$  (10 mL) and was stirred under  $\text{N}_2$  for 24 h at reflux. Till cooled, the precipitate was filtered off. This solid was dissolved in hot water (100 mL) and saturated aqueous  $\text{NH}_4\text{PF}_6$  was added. The precipitate was collected and washed with  $\text{H}_2\text{O}$  to yield **3** as a white solid (654 mg, 98%). mp 265.9–267.5 °C. The  $^1\text{H}$  NMR spectrum of **3** is shown in Figure S4.  $^1\text{H}$  NMR (400 MHz, acetone- $d_6$ , room temperature)  $\delta$  (ppm): 9.26 (d,  $J = 6.4$  Hz, 4H), 8.50 (d,  $J = 6.8$  Hz, 4H), 8.23 (s, 2H), 7.58–7.67 (m, 4H), 7.46–7.52 (m, 6H), 6.05 (s, 4H). The  $^{13}\text{C}$  NMR spectrum of **3** is shown in Figure S5.  $^{13}\text{C}$  NMR (125 MHz, acetonitrile- $d_3$ , room temperature)  $\delta$  (ppm): 65.11, 127.13, 130.20, 130.54, 130.94, 133.84, 135.03, 145.76, and 152.50. LRESIMS is shown in Figure S6:  $m/z$  363.1  $[\text{M} - 2\text{PF}_6]^{2+}$  (100%), 509.0  $[\text{M} - \text{PF}_6]^+$  (100%). HRESIMS:  $m/z$  calcd for  $[\text{M} - 2\text{PF}_6]^{2+}$   $\text{C}_{26}\text{H}_{24}\text{N}_2^{2+}$ , 364.1939; found 364.1927, error –3.3 ppm.

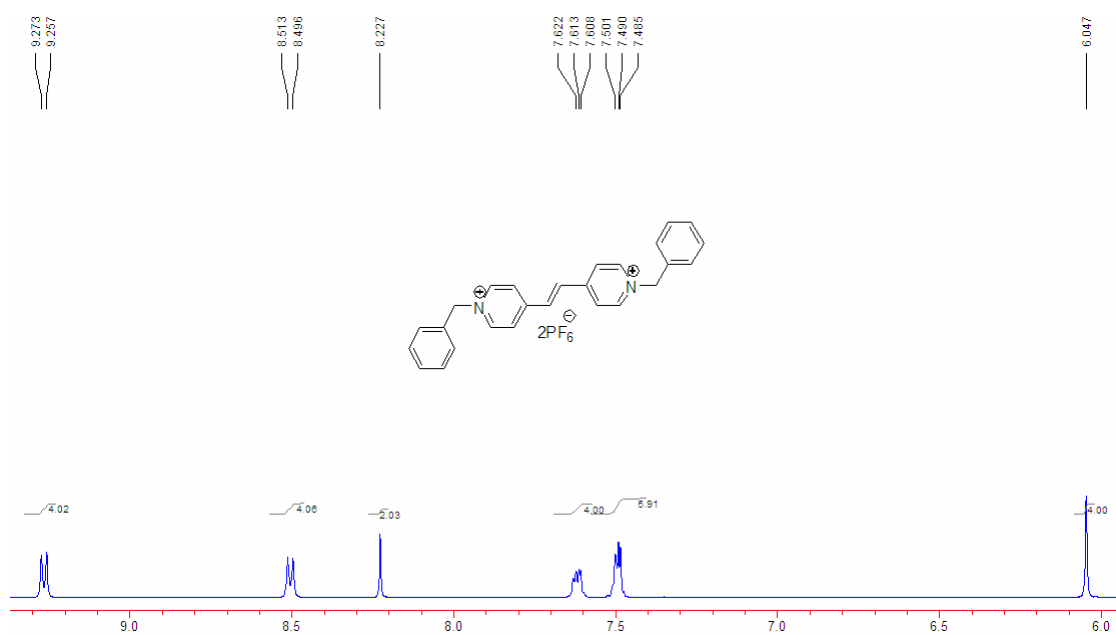

**Figure S4.** <sup>1</sup>H NMR spectrum (400 MHz, acetone-*d*<sub>6</sub>, room temperature) of **3**.

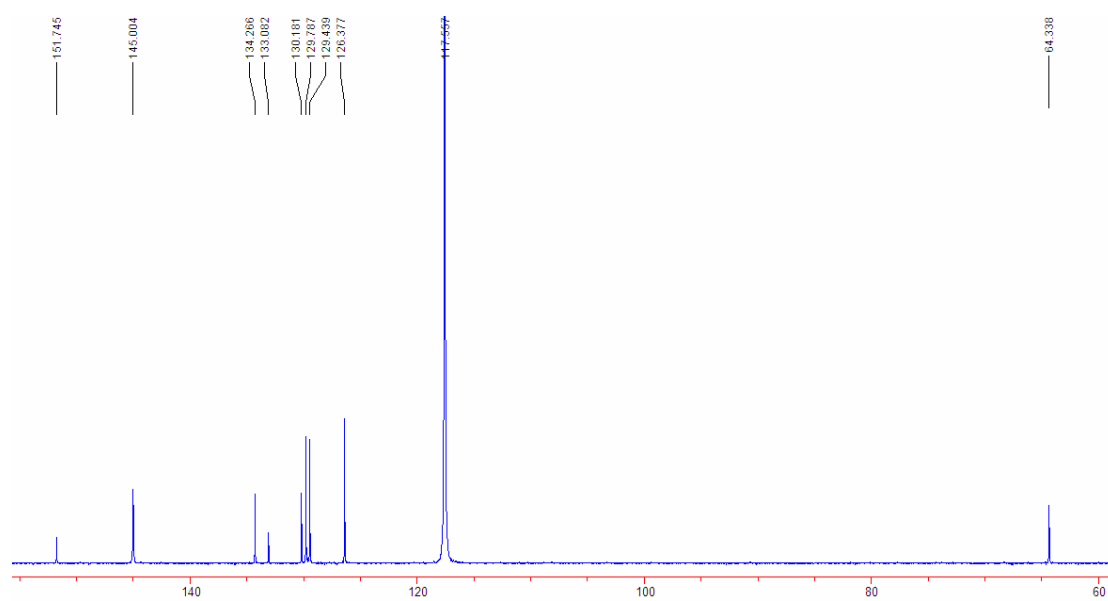

**Figure S5.** <sup>13</sup>C NMR spectrum (125 MHz, acetonitrile-*d*<sub>3</sub>, room temperature) of **3**.

## Display Report

### Analysis Info

|               |                         |                  |                   |
|---------------|-------------------------|------------------|-------------------|
| Analysis Name | 11041928.d              | Acquisition Date | 04/19/11 20:10:39 |
| Method        | Copy of E3Kp Default.ms | Operator         | Administrator     |
| Sample Name   | XYZ-2516                | Instrument       | esquire3000plus   |
| Comment       |                         |                  |                   |

### Acquisition Parameter

|                   |             |              |           |                          |          |
|-------------------|-------------|--------------|-----------|--------------------------|----------|
| Ion Source Type   | ESI         | Ion Polarity | Positive  | Alternating Ion Polarity | off      |
| Mass Range Mode   | Std/Normal  | Scan Begin   | 103 m/z   | Scan End                 | 1000 m/z |
| Capillary Exit    | 226.0 Volt  | Skim 1       | 40.0 Volt | Trap Drive               | 62.2     |
| Accumulation Time | 465 $\mu$ s | Averages     | 5 Spectra | Auto MS/MS               | off      |

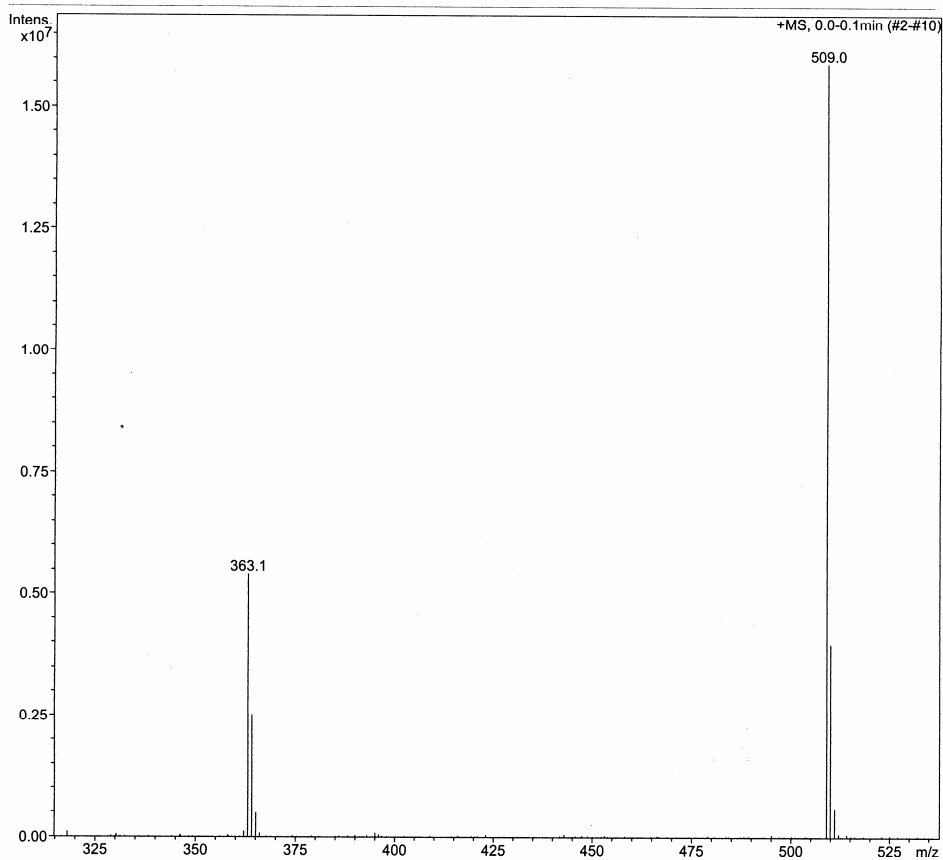

Bruker Daltonics DataAnalysis 3.1

printed: 04/19/11 20:48:36

Page 1 of 1

**Figure S6.** Electrospray ionization mass spectrum of **3**.



3. Job plots of  $1 \rightarrow 3$ ,  $2 \rightarrow 3$ , and  $2 \rightarrow 4$  based on UV-Vis data in acetone

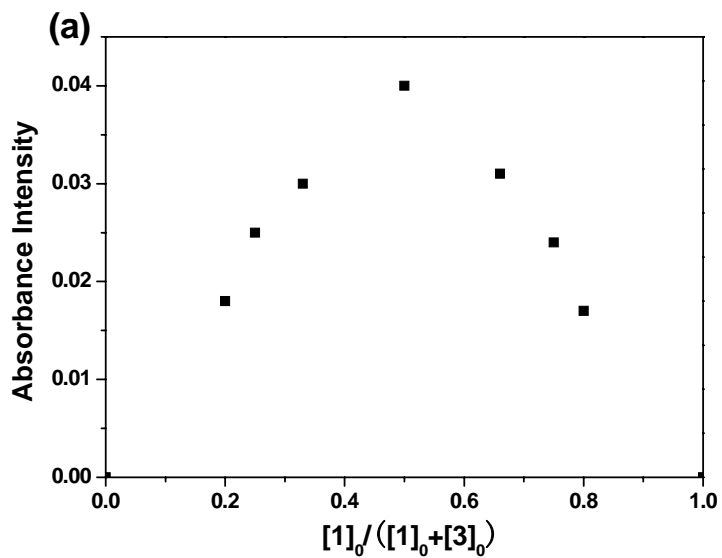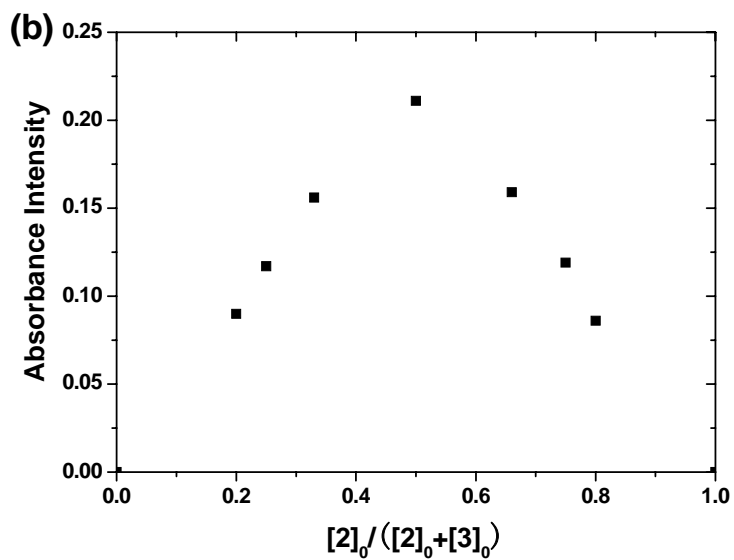

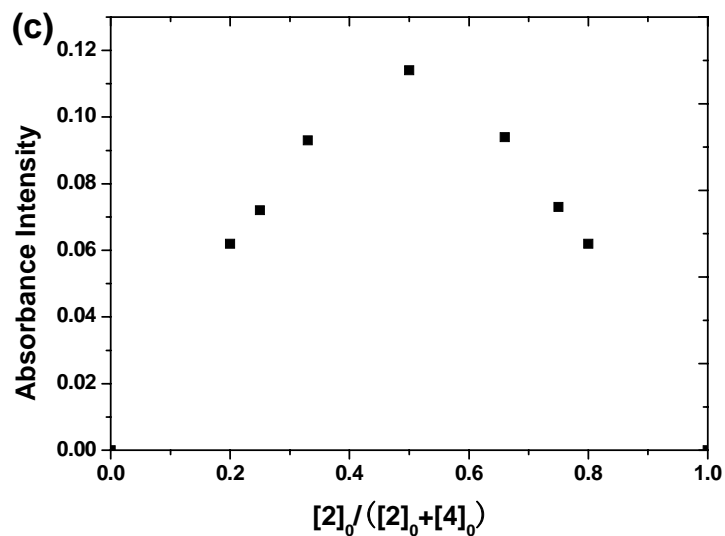

**Figure S7.** Job plots showing the 1:1 stoichiometries of the complexes between **1** and **3** (a), between **2** and **3** (b), and between **2** and **4** (c) in acetone: (a)  $[1]_0 + [3]_0 = 1.00$  mM; (b)  $[2]_0 + [3]_0 = 1.00$  mM; (c)  $[2]_0 + [4]_0 = 1.00$  mM.  $[1]_0$ ,  $[2]_0$ ,  $[3]_0$ , and  $[4]_0$  are the initial concentrations of **1**, **2**, **3**, and **4**, respectively.

#### 4. Determination of association constants of **1**·**3**, **2**·**3**, and **2**·**4**<sup>S2</sup>

The association constants of complexes **1**·**3**, **2**·**3**, and **2**·**4** were determined by probing the charge-transfer band of the complexes by UV-vis spectroscopy and employing a titration method. Progressive addition of an acetone solution with high guest **3** (or **4**) concentration and low host **1** or **2** concentration to a acetone solution with the same concentration of host **1** or **2** resulted in an increase of the intensity of the charge-transfer band of the complex. Treatment of the collected absorbance data at  $\lambda = 403$  nm with a non-linear curve-fitting program afforded the corresponding association constants ( $K_a$ ):  $962 (\pm 55) \text{ M}^{-1}$  for **2**·**3**, and  $127 (\pm 16) \text{ M}^{-1}$  for **1**·**3**, and  $714 (\pm 78) \text{ M}^{-1}$  for **2**·**4**.

The non-linear curve-fitting was based on the equation:

$$A = (A_\infty/[H]_0) (0.5[G]_0 + 0.5([H]_0 + 1/K_a) - (0.5([G]_0^2 + (2[G]_0(1/K_a - [H]_0) + (1/K_a + [H]_0)^2)^{0.5})) \quad (\text{Eq. S1})$$

Where  $A$  is the absorption intensity of the charge-transfer band ( $\lambda = 403$  nm) at  $[G]_0$ ,  $A_\infty$  is the absorption intensity of the charge-transfer band ( $\lambda = 403$  nm) when the host is completely complexed,  $[H]_0$  is the fixed initial concentration of the host, and  $[G]_0$  is the initial concentration of the guest.

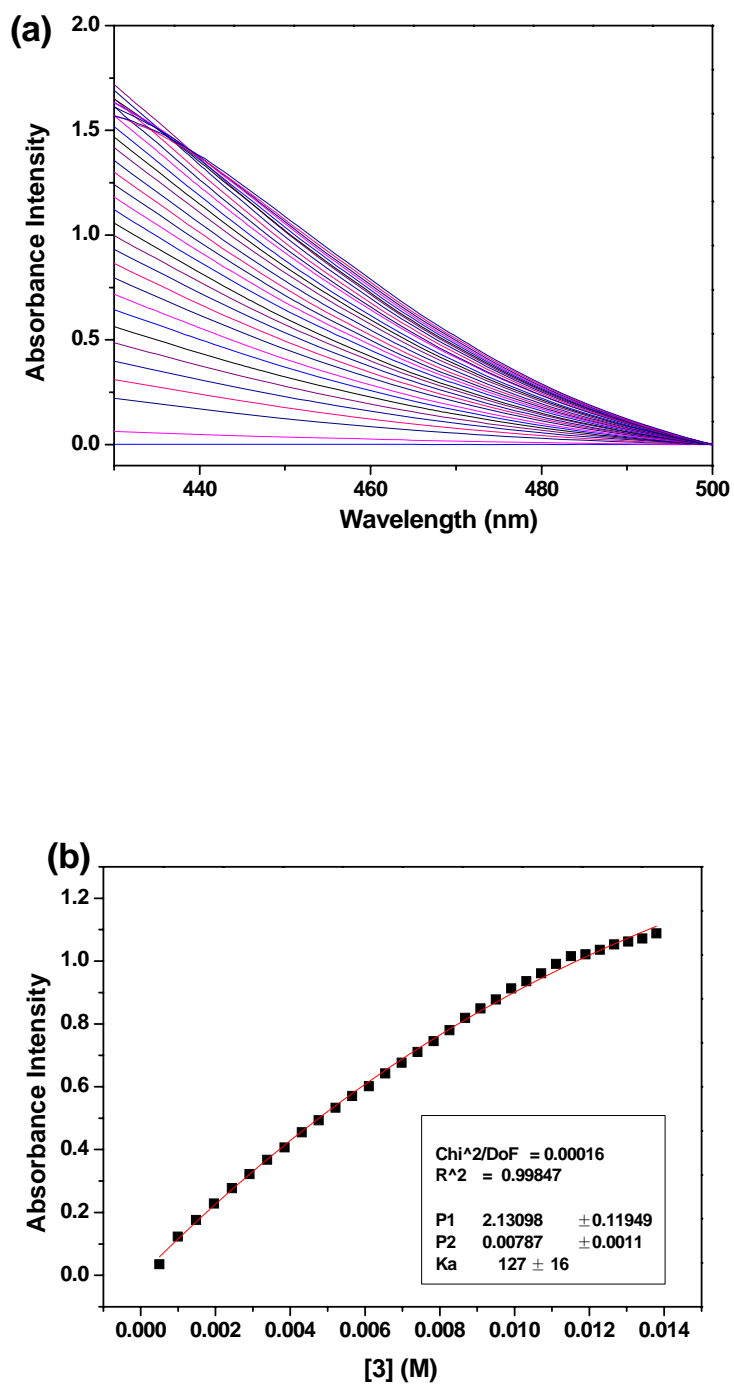

**Figure S8.** (a) The absorption spectral changes of **1** upon addition of **3** and (b) the absorbance intensity changes upon addition of **3**. The red solid line was obtained from the non-linear curve-fitting using Eq. S1.

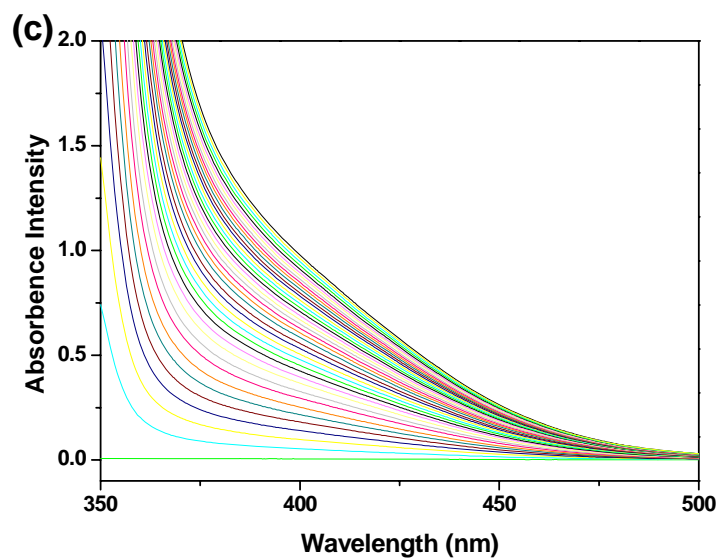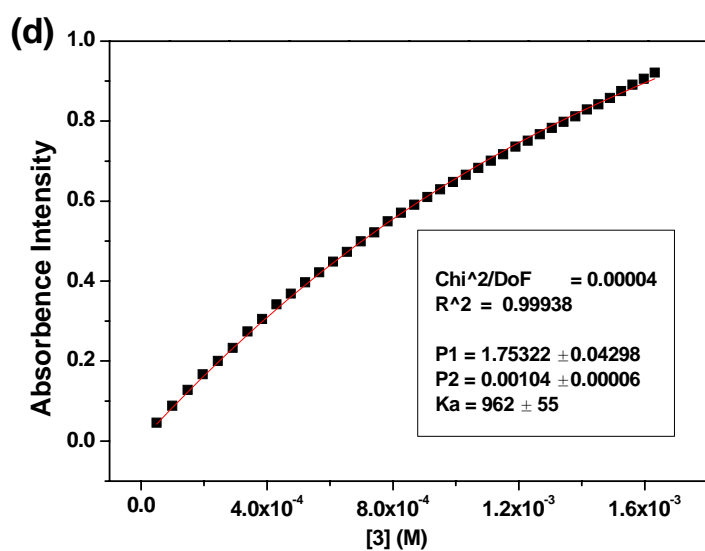

**Figure S9.** (c) The absorption spectral changes of **2** upon addition of **3** and (d) the absorbance intensity changes upon addition of **3**. The red solid line was obtained from the non-linear curve-fitting using Eq. S1.

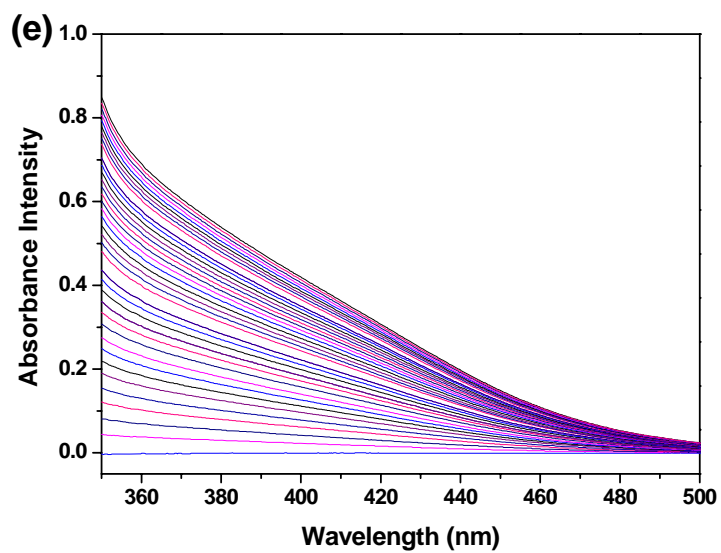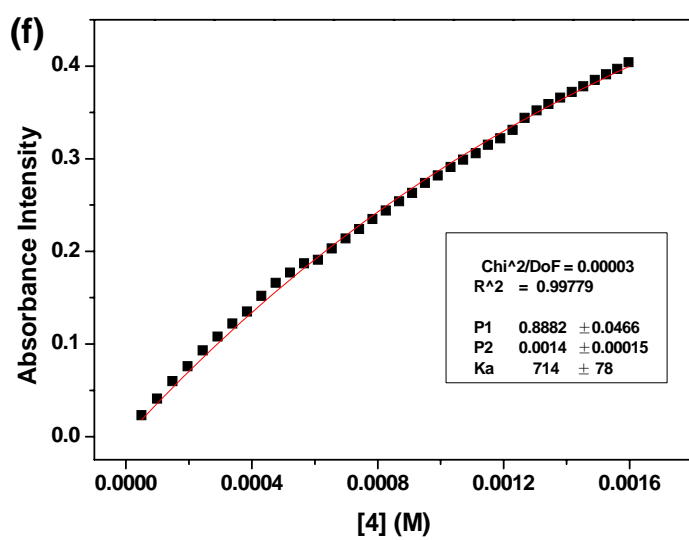

**Figure S10.** (e) The absorption spectral changes of **2** upon addition of **4** and (f) the absorbance intensity changes upon addition of **4**. The red solid line was obtained from the non-linear curve-fitting using Eq. S1.

5. Electrospray ionization mass spectra of equimolar acetone solutions of **2** with either of guests **3** and **4**

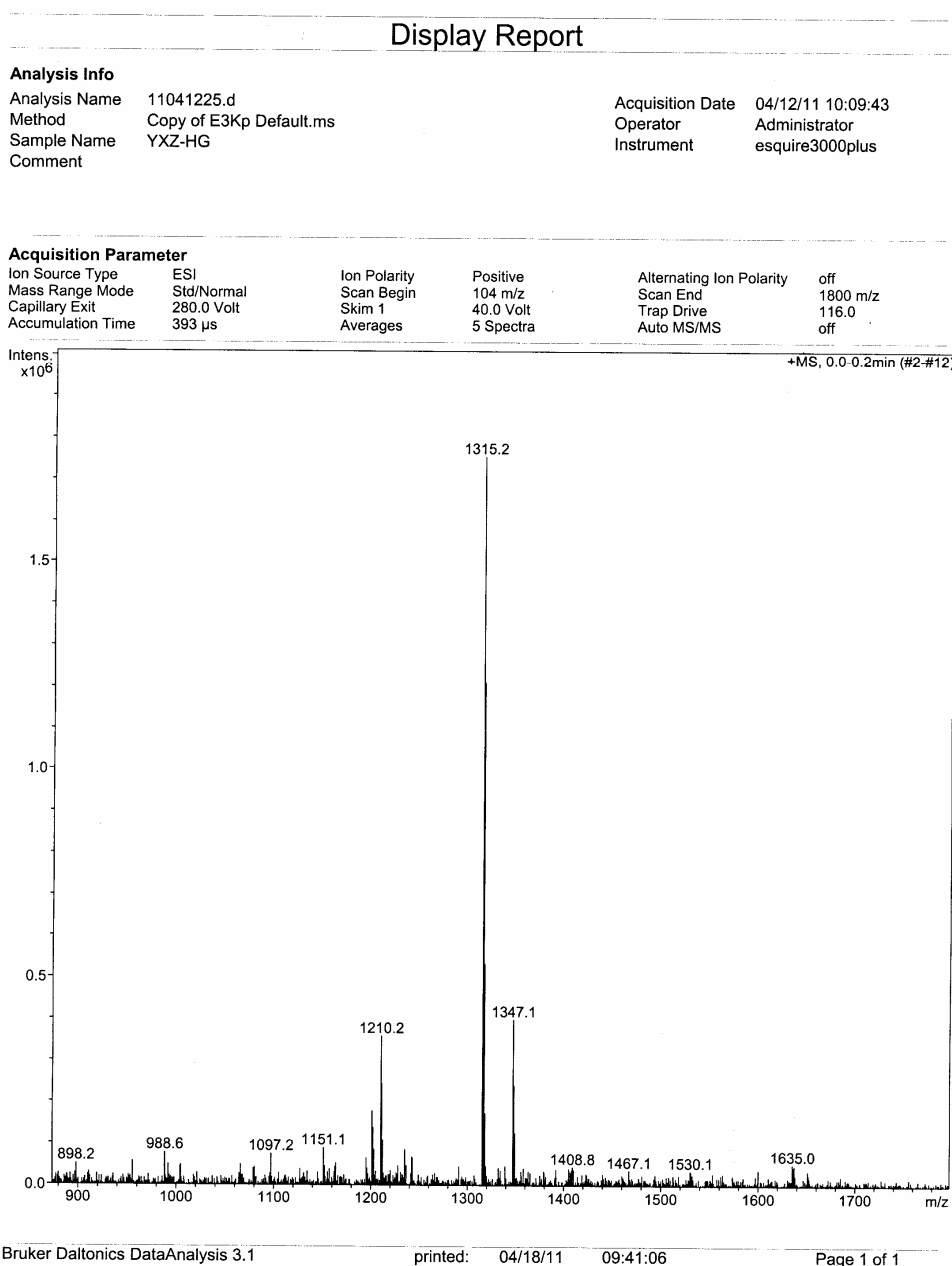

**Figure S11.** Positive electrospray ionization mass spectrum in acetone of equimolar mixtures of **2** and **3** gave strong mass fragment: 1315.2, which correspond to  $[\mathbf{2} \cdot \mathbf{3} - \text{PF}_6]^+$ , respectively. This result confirmed the 1:1 complexation stoichiometry between **2** and **3**.

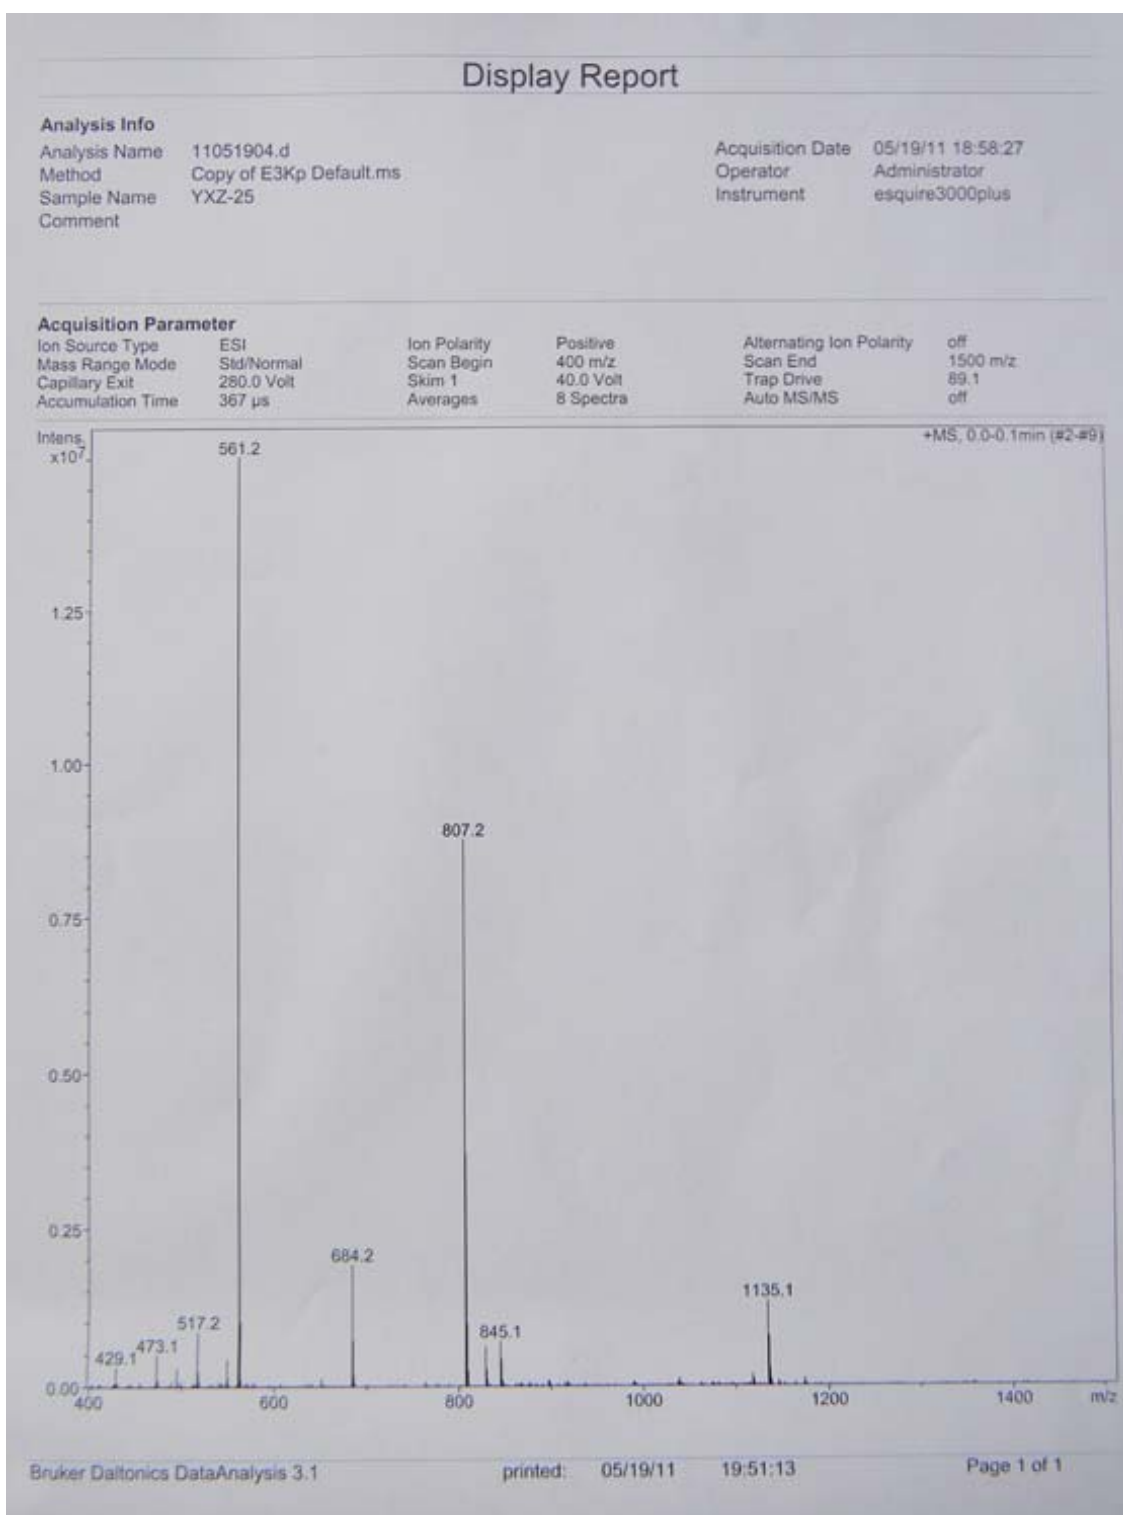

**Figure S12.** Positive electrospray ionization mass spectrum in acetone of equimolar mixtures of **2** and **4** gave mass fragment:  $m/z$  1135.1, which correspond to  $[\mathbf{2-3} - \text{PF}_6]^+$ .



6. Partial  $^1\text{H}$  NMR spectra of equimolar solutions of either of hosts **1** and **2** with guests **3**

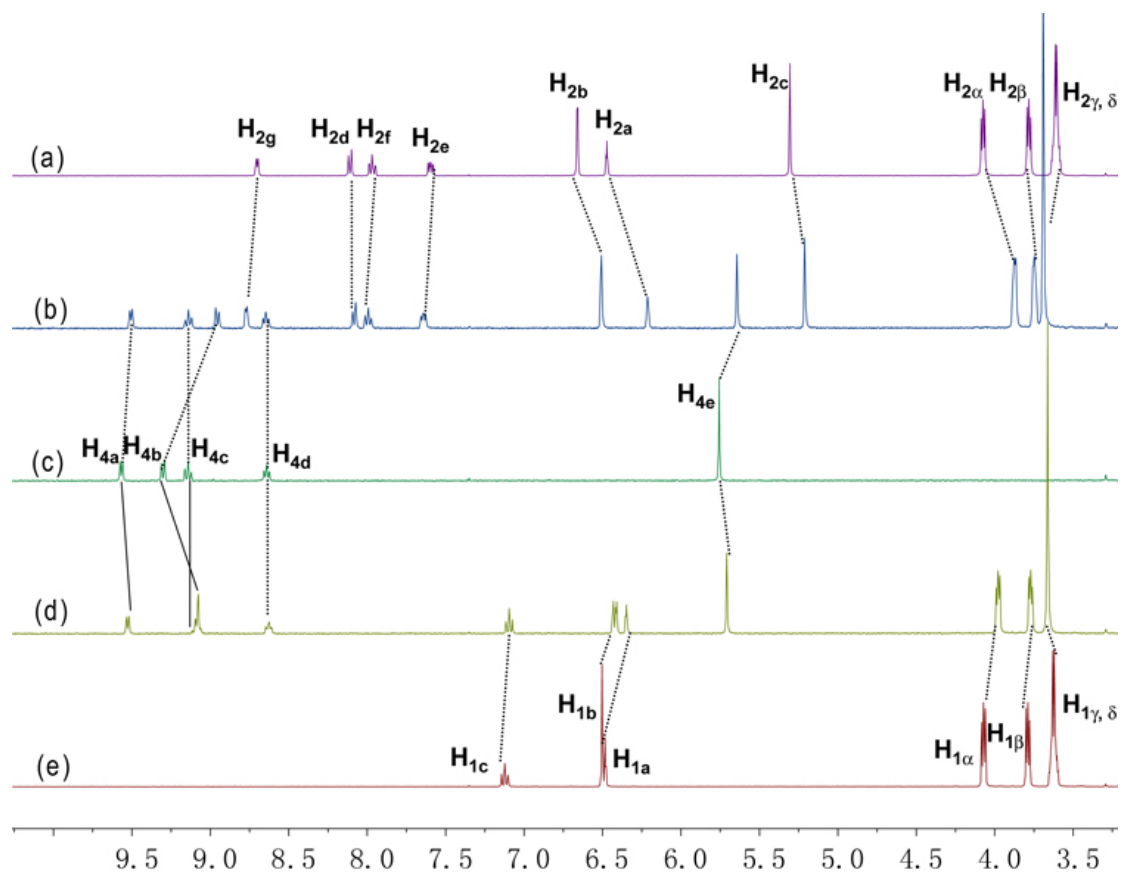

**Figure S13.** Partial  $^1\text{H}$  NMR spectra (acetone- $d_6$ , 293 K, 400 MHz) of (a) 2.00 mM **2**; (b) 2.00 mM **2** + 2.00 mM **4**; (c) 2.00 mM **4**; (d) 2.00 mM **1** + 2.00 mM **4**; and (e) 2.00 mM **1**.

7. Schematic representation of reversible control of the formation of [2] pseudorataxane based on a supramolecular cryptand

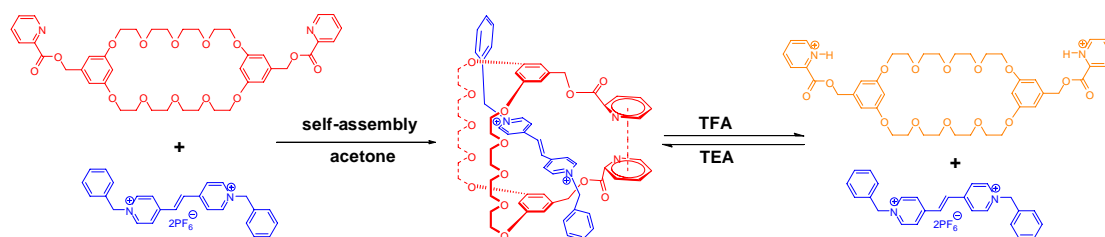

**Scheme S2.** Reversible control of the formation of [2] pseudorataxane based on the supramolecular cryptand.

8. X-ray crystal data for **2**→**3**

Crystallographic data: block, yellow,  $0.35 \times 0.26 \times 0.23 \text{ mm}^3$ ,  $\text{C}_{68}\text{H}_{74}\text{F}_{12}\text{N}_4\text{O}_{14}\text{P}_2$ ,  $FW$  1461.25, triclinic, space group  $P-1$ ,  $a = 10.7621(4)$ ,  $b = 12.8281(5)$ ,  $c = 29.8195(11) \text{ \AA}$ ,  $\alpha = 85.387(3)^\circ$ ,  $\beta = 84.518(3)^\circ$ ,  $\gamma = 70.803(4)^\circ$ ,  $V = 3864.8(3) \text{ \AA}^3$ ,  $Z = 2$ ,  $D_c = 1.256 \text{ g cm}^{-3}$ ,  $T = 100 (2) \text{ K}$ ,  $\mu = 1.286 \text{ mm}^{-1}$ , 29018 measured reflections, 13386 independent reflections, 901 parameters, 0 restraints,  $F(000) = 1520$ ,  $R(\text{int}) = 0.0229$ ,  $R_1 = 0.0689$ ,  $wR_1 = 0.1625$  (all data),  $R_2 = 0.0621$ ,  $wR_2 = 0.1573 [I > 2\sigma(I)]$ , max. residual density  $1.455 \text{ e}\cdot\text{\AA}^{-3}$ , and goodness-of-fit ( $F^2$ ) = 1.066. CCDC 829264.

9. X-ray crystal data for **2**→**4**

Crystallographic data: block, yellow,  $0.28 \times 0.23 \times 0.18 \text{ mm}^3$ ,  $\text{C}_{54}\text{H}_{62}\text{F}_{12}\text{N}_4\text{O}_{14}\text{P}_2$ ,  $FW$  1281.02, monoclinic, space group  $P 21/c$ ,  $a = 10.8701(3)$ ,  $b = 22.6954(6)$ ,  $c = 22.8977(6) \text{ \AA}$ ,  $\alpha = 90.00^\circ$ ,  $\beta = 100.794(3)^\circ$ ,  $\gamma = 90.00^\circ$ ,  $V = 5549.0(3) \text{ \AA}^3$ ,  $Z = 4$ ,  $D_c = 1.533 \text{ g cm}^{-3}$ ,  $T = 100 (2) \text{ K}$ ,  $\mu = 1.700 \text{ mm}^{-1}$ , 31682 measured reflections, 9701 independent reflections, 775 parameters, 0 restraints,  $F(000) = 2656$ ,  $R(\text{int}) = 0.0394$ ,  $R_1 = 0.0543$ ,  $wR_1 = 0.1325$  (all data),  $R_2 = 0.0432$ ,  $wR_2 = 0.1224 [I > 2\sigma(I)]$ , max. residual density  $0.962 \text{ e}\cdot\text{\AA}^{-3}$ , and goodness-of-fit ( $F^2$ ) = 1.091. CCDC 829263.

*References:*

- S1. H. W. Gibson, D. S. Nagvekar, *Can. J. Chem.* **1997**, *75*, 1375–1384.
- S2. K. A. Connors, *Binding Constants*; Wiley: New York, **1987**. Corbin, P. S. Ph.D. Dissertation, University of Illinois at Urbana-Champaign, Urbana, IL, **1999**. P. R. Ashton, R. Ballardini, V. Balzani, M. Belohradsky, M. T. Gandolfi, D. Philp, L. Prodi, F. M. Raymo, M. V. Reddington, N. Spencer, J. F. Stoddart, M. Venturi, D. J. Williams, *J. Am. Chem. Soc.* **1996**, *118*, 4931–4951.
